# Supplementary material for: NPAS2 Promotes MASLD and Hepatocarcinogenesis through SIRT1-Mediated PPARγ Suppression
Source: Research Square preprint supplement (doi:10.21203/rs.3.rs-8137044/v1), 2025-12-03
Supplement: Supplementary file 1 [file 30a0f17641856c9850c4249a.docx]

**Supplementary Table 1.**

Correlation between NPAS2 and SIRT1 expression in HCC tissues

| NPAS2  Expression | SIRT1 Expression | | | | Total，N |
| --- | --- | --- | --- | --- | --- |
| （-） | （+） | （++） | （+++） |
| （-） | 2 | 1 | 0 | 0 | 3 |
| （+） | 1 | 2 | 2 | 2 | 7 |
| （++） | 0 | 1 | 3 | 6 | 10 |
| （+++） | 0 | 1 | 4 | 9 | 14 |
| Total，N | 3 | 5 | 9 | 17 | 34 |

Using the spearman correlation analysis,r=0.602,P<0.01

Correlation between NPAS2 and PPARγ expression in HCC tissues

| NPAS2  Expression | PPARγ Expression | | | | Total，N |
| --- | --- | --- | --- | --- | --- |
| （-） | （+） | （++） | （+++） |
| （-） | 0 | 0 | 2 | 1 | 3 |
| （+） | 1 | 2 | 2 | 2 | 7 |
| （++） | 5 | 4 | 1 | 0 | 10 |
| （+++） | 9 | 3 | 1 | 1 | 14 |
| Total，N | 15 | 9 | 6 | 4 | 34 |

Using the spearman correlation analysis, r = -0.512, p < 0.01

**Supplementary Table 2. Primers for real-time PCR**

| **Primer name** | **Sequences** |
| --- | --- |
| *NPAS2* forward primer: | TCTGGATCACAGAGCACCTC |
| reverse primer: | CAGGAGCTCCAGGTCATCA |
| *β-actin* forward primer: | CCCAGCCATGTACGTTGCTA |
| reverse primer: | TCACCGGAGTCCATCACGAT |
| *IL-1β* forward primer: | TGCCACCTTTTGACAGTGATG |
| reverse primer: | AAGGTCCACGGGAAAGACAC |
| *IL-2* forward primer: | GCGGCATGTTCTGGATTTGACTC |
| reverse primer: | CCACCACAGTTGCTGACTCATC |
| *IL-4* forward primer: | ATGGGTCTCAACCCCCAGCTAGT |
| reverse primer: | GCTCTTTAGGCTTTCCAGGAAGTC |
| *IL-6* forward primer: | CAACGATGATGCACTTGCAGA |
| reverse primer: | GTGACTCCAGCTTATCTCTTGGT |
| *TNF-α* forward primer: | TGATCGGTCCCCAAAGGGAT |
| reverse primer: | TGTCTTTGAGATCCATGCCGT |
| *CD36*  forward primer: | GATGACGTGGCAAAGAACAG |
| reverse primer: | TCCTCGGGGTCCTGAGTTAT |
| *FABP4* forward primer: | TGAAATCACCGCAGACGACAGG |
| reverse primer: | GCTTGTCACCATCTCGTTTTCTC |
| *PLIN2* forward primer: | GACAGGATGGAGGAGAAGACTGC |
| reverse primer: | GGTAGTCGTCACCACATCCTTC |
| *ADRP* forward primer: | GACAGGATGGAGGAGAAGACTGC |
| reverse primer: | GGTAGTCGTCACCACATCCTTC |
| *SREBF1* forward primer: | CGACTACATCCGCTTCTTGCAG |
| reverse primer: | CCTCCATAGACACATCTGTGCC |
| *ACACA* forward primer: | GTTCTGTTGGACAACGCCTTCAC |
| reverse primer: | GGAGTCACAGAAGCAGCCCATT |
| *FASN* forward primer: | CACAGTGCTCAAAGGACATGCC |
| reverse primer: | CACCAGGTGTGCCTTCCTC |
| *CPT1A* forward primer: | GGCATAAACGCAGAGCATTCCTG |
| reverse primer: | CAGTGTCCATCCTCTGAGTAGC |
| *ACOX1* forward primer: | GCCATTCGATACAGTGCTGTGTGAG |
| reverse primer: | CCGAGAAAGTGGAAGGCATAGG |
| *GRP78* forward primer: | TGTCTTCTCAGCATCAAGCAAGG |
| reverse primer: | CCAACACTTCCTGGACAGGCTT |
| *XBP1s* forward primer: | TGGACTCTGACACTGTTGCCTC |
| reverse primer: | TAGACCTCTGGGAGTTCCTCCA |
| *CHOP* forward primer: | GGAGGTCCTGTCCTCAGATGAA |
| reverse primer: | GCTCCTCTGTCAGCCAAGCTAG |
| *ATF4* forward primer: | AACCTCATGGGTTCTCCAGCGA |
| reverse primer: | CTCCAACATCCAATCTGTCCCG |
| *ORP150* forward primer: | CACCTTTAACCGCTACAGCCATG |
| reverse primer: | ACTGTGGTCAGATTCTGGGAGC |
| *COL1A1* forward primer: | CCTCAGGGTATTGCTGGACAAC |
| reverse primer: | CAGAAGGACCTTGTTTGCCAGG |
| *COL3A1* forward primer: | GACCAAAAGGTGATGCTGGACAG |
| reverse primer: | CAAGACCTCGTGCTCCAGTTAG |
| *ACTA2* forward primer: | TGCTGACAGAGGCACCACTGAA |
| reverse primer: | CAGTTGTACGTCCAGAGGCATAG |
| *TGFB1* forward primer: | TGATACGCCTGAGTGGCTCTCTCT |
| reverse primer: | CACAAGAGCAGTGAGCGCTGAA |
| *PPARA* forward primer: | ACCACTACGGAGTTCACGCATG |
| reverse primer: | GAATCTTGCAGCTCCGATCACAC |
| *PPARD* forward primer: | GGACCAGAACACGCTCTCTT |
| reverse primer: | CCGACATTCCATGTTGAGGCTG |
| *PPARG* forward primer: | GTACTGTCGGTTTCAGAAGTGCC |
| reverse primer: | ATCTCCGCCAACAGCTTCTCCT |
| *SIRT1* forward primer: | GGAGCAGATTAGTAAGCGGCTTG |
| reverse primer: | GTTACTGCCACAGGAACTAGAGG |
| *AFP* forward primer: | GCTCACATCCACGAGGAGTT |
| reverse primer: | CAGAAGCCTAGTTGGATCATGGG |
| *GPC3* forward primer: | CTGTGCTGGAACGGACAAGAAC |
| reverse primer: | GTCAATGATCTGGCTAACCACCG |
| *EPCAM* forward primer: | GAGTCCGAAGAACCGACAAGGA |
| reverse primer: | GATGTGAACGCCTCTTGAAGCG |
| *CD44* forward primer: | CGGAACCACAGCCTCCTTTCAA |
| reverse primer: | TGCCATCCGTTCTGAAACCACG |

**Supplementary Table 3. Primers for SIRT1 promoter construct**

| **Primer name** | **Sequences** | **Enzyme Concentrationdilutions** |
| --- | --- | --- |
| (-2513/+45) SIRT1 forward primer: | GGGGTTACATCATACTGGTCAGGC | Kpn I |
| (-1402/+45) SIRT1 forward primer: | GACCCCCACGCAACCAAAGATG | Kpn I |
| (-511/+45) SIRT1 forward primer: | GAACGGTGTGAGGAGAGTGGGA | Kpn I |
| (-110/+45) SIRT1 forward primer: | GTGTTGTGGTCTGGCCCGCGTG | Kpn I |
| reverse primer: CTCCTCCCTCGCCTCCTCTGCT | CTCCTCCCTCGCCTCCTCTGCT | Xho I |

**Supplementary Table 4. Primers for SIRT1 promoter site-directed mutagenesis**

| **Primer name** | **Sequences** | **Enzyme Concentrationdilutions** |
| --- | --- | --- |
| (-511/+45) SIRT1 forward primer: | GCACTACACGCTCGCCACAAAGA | Kpn I |
| (-511/+45) SIRT1 reverse primer: | AACCCCATCACGTGACCCGCCCC | Kpn I |

**Supplementary Table 5. Antibody for Westren Blotting**

| **Antibody** | **Company (Cat. No.)** | **Working dilutions diDIConcentrationdilutions** |
| --- | --- | --- |
| NPAS2 | Novusio(NBP1-31363) | 1/500 |
| AKT | Proteintech(10176-2-AP) | 1/5000 |
| P-AKT | Proteintech(66444-1-IG) | 1/5000 |
| PPARA | Proteintech(66826-1-IG) | 1/2000 |
| PPARD | Proteintech(28053-1-AP) | 1/500 |
| PPARG | Proteintech(16643-1-AP) | 1/1000 |
| SIRT1 | Proteintech(13161-1-AP) | 1/2000 |
| CD36 | Proteintech(18836-1-AP) | 1/1000 |
| FABP4 | Proteintech(12802-1-AP) | 1/8000 |
| BMAL1 | Proteintech(14268-1-AP) | 1/4000 |
| RXRA | Proteintech(83796-5-RR) | 1/2000 |
| β-actin | Proteintech (66009-1-IG) | 1/40000 |
| Rabbit IgG | Cohesion(CSA2115) | 1/10000 |
| Mouse IgG | Cohesion (CSA2108) | 1/10000 |

**Supplementary Table 6. Primers for IHC**

| **Antibody** | **Company (Cat. No.)** | **Working dilutions diDIConcentrationdilutions** |
| --- | --- | --- |
| NPAS2 | Novusio(NBP1-31363) | 1/350 |
| SIRT1 | Proteintech(10176-2-AP) | 1/400 |
| PPARG | Proteintech(16643-1-AP) | 1/500 |
| Ki-67 | Affinity（AF0198） | 1/100 |
